# Supplementary material for: 2020 Seoul Consensus on the Diagnosis and Management of Gastroesophageal Reflux Disease
Source: PubMed Central journal article supplement — J Neurogastroenterol Motil. 2021 Oct 30;27(4):453–81. doi: 10.5056/jnm21077 (PMC8521465; doi:10.5056/jnm21077), 2021-10-30
Supplement: jnm-27-4-453-supple.pdf [file jnm-27-4-453-supple.pdf]

**Supplementary Table 1.** Conflict of Interest Register

| Name                | Relevant employee experience | Relevant consultation experience | Personal ownership interest | Non-personal pecuniary interest                                                                                  | Relevant honorarium experience                                                                                             | Action required |
|---------------------|------------------------------|----------------------------------|-----------------------------|------------------------------------------------------------------------------------------------------------------|----------------------------------------------------------------------------------------------------------------------------|-----------------|
| Hye-Kyung Jung      | None                         | None                             | None                        | None                                                                                                             | None                                                                                                                       | None            |
| Chung Hyun Tae      | None                         | None                             | None                        | None                                                                                                             | None                                                                                                                       | None            |
| Kyung Ho Song       | None                         | None                             | None                        | None                                                                                                             | None                                                                                                                       | None            |
| Seung Joo Kang      | None                         | None                             | None                        | None                                                                                                             | None                                                                                                                       | None            |
| Jong Kyu Park       | None                         | None                             | None                        | None                                                                                                             | None                                                                                                                       | None            |
| Jeong Eun Shin      | None                         | None                             | None                        | None                                                                                                             | None                                                                                                                       | None            |
| Hyun Chul Lim       | None                         | None                             | None                        | None                                                                                                             | None                                                                                                                       | None            |
| Sang Kil Lee        | None                         | None                             | None                        | None                                                                                                             | None                                                                                                                       | None            |
| Da Hyun Jung        | None                         | None                             | None                        | None                                                                                                             | None                                                                                                                       | None            |
| Yoon Jin Choi       | None                         | None                             | None                        | None                                                                                                             | None                                                                                                                       | None            |
| Seung In Seo        | None                         | None                             | None                        | None                                                                                                             | None                                                                                                                       | None            |
| Joon Sung Kim       | None                         | None                             | None                        | None                                                                                                             | None                                                                                                                       | None            |
| Jung Min Lee        | None                         | None                             | None                        | None                                                                                                             | None                                                                                                                       | None            |
| Beom Jin Kim        | None                         | None                             | None                        | None                                                                                                             | None                                                                                                                       | None            |
| Sun Hyung Kang      | None                         | None                             | None                        | None                                                                                                             | None                                                                                                                       | None            |
| Chan Hyuk Park      | None                         | None                             | None                        | Received research funding from Daewoong Pharmaceutical, Hanmi Pharmaceutical, and CJ HealthCare                  | None                                                                                                                       | None            |
| Suck Chei Choi      | None                         | None                             | None                        | None                                                                                                             | None                                                                                                                       | None            |
| Joong Goo Kwon      | None                         | None                             | None                        | Received research funding for ilaprazole in NERD from IL-YANG PHARM, and tegoprazan in GERD from HK inno. N Corp | None                                                                                                                       | None            |
| Kyung Sik Park      | None                         | None                             | None                        | None                                                                                                             | None                                                                                                                       | None            |
| Moo In Park         | None                         | None                             | None                        | None                                                                                                             | None                                                                                                                       | None            |
| Tae Hee Lee         | None                         | None                             | None                        | None                                                                                                             | None                                                                                                                       | None            |
| Seung Young Kim     | None                         | None                             | None                        | None                                                                                                             | None                                                                                                                       | None            |
| Young Sin Cho       | None                         | None                             | None                        | None                                                                                                             | None                                                                                                                       | None            |
| Han Hong Lee        | None                         | None                             | None                        | None                                                                                                             | None                                                                                                                       | None            |
| Eun Jeong Gong      | None                         | None                             | None                        | None                                                                                                             | None                                                                                                                       | None            |
| Kee Wook Jung       | None                         | None                             | None                        | Received research funding for tegoprazan from HK inno. N Corp                                                    | None                                                                                                                       | None            |
| Do Hoon Kim         | None                         | None                             | None                        | None                                                                                                             | None                                                                                                                       | None            |
| Hee Seok Moon       | None                         | None                             | None                        | None                                                                                                             | None                                                                                                                       | None            |
| Hirota Miwa         | None                         | None                             | None                        | Received research funding from Pharmaceutical Co, Ltd, Otsuka Pharmaceutical Co, Ltd, Astra Zeneca Co, Ltd       | Received honorarium from Takeda Pharmaceutical Co, Ltd, Otsuka Pharmaceutical Co, Ltd, Astra Zeneca Co, Ltd, Eisai Co, Ltd | None            |
| Chien-Lin Chen      | None                         | None                             | None                        | None                                                                                                             | None                                                                                                                       | None            |
| Sutep Gonlanchanvit | None                         | None                             | None                        | None                                                                                                             | Received lecturer's fees from Takeda Pharmaceutical Co, Ltd, and Otsuka Pharmaceutical Co, Ltd                             | None            |
| Uday C Ghoshal      | None                         | None                             | None                        | None                                                                                                             | None                                                                                                                       | None            |
| Justin C Wu         | None                         | None                             | None                        | None                                                                                                             | None                                                                                                                       | None            |
| Kewin T H Siah      | None                         | None                             | None                        | None                                                                                                             | None                                                                                                                       | None            |
| Xiaohua Hou         | None                         | None                             | None                        | None                                                                                                             | None                                                                                                                       | None            |
| Tadayuki Oshima     | None                         | None                             | None                        | None                                                                                                             | None                                                                                                                       | None            |
| Mi-Young Choi       | None                         | None                             | None                        | None                                                                                                             | None                                                                                                                       | None            |
| Kwang Jae Lee       | None                         | None                             | None                        | None                                                                                                             | None                                                                                                                       | None            |

NERD, non-erosive reflux disease; GERD, gastroesophageal reflux disease.

**Supplementary Table 2.** Key Questions and Keywords Used in Meta-analyses

| Key questions                                                                                                                                                                                          | Keywords                                                                                                                                                                                                                                                                                                                                                                                                                                                                                        |
|--------------------------------------------------------------------------------------------------------------------------------------------------------------------------------------------------------|-------------------------------------------------------------------------------------------------------------------------------------------------------------------------------------------------------------------------------------------------------------------------------------------------------------------------------------------------------------------------------------------------------------------------------------------------------------------------------------------------|
| Is GERD increasing in Asia?                                                                                                                                                                            | Gastroesophageal reflux, esophagitis, gastroesophageal, gastric acid, esophageal, GERD, GER, ERD, prevalence, epidemiology                                                                                                                                                                                                                                                                                                                                                                      |
| Is a 2-week trial of a standard dose of PPI useful as a sensitive and practical test for GERD diagnosis in patients with typical GERD symptoms compared to 24-hour ambulatory pH-impedance monitoring? | Gastroesophageal reflux disease, erosive esophagitis, non-erosive esophagitis, a proton-pump inhibitor, omeprazole, esomeprazole, rabeprazole, pantoprazole, lansoprazole, ilaprazole, dexlansoprazole, wireless pH monitoring, impedance-pH monitoring, ambulatory reflux monitoring, pH monitoring, sensitivity, specificity                                                                                                                                                                  |
| Is a double dose proton pump inhibitor effective for alleviating symptoms in patients with GERD who have insufficient effectiveness with standard proton pump inhibitors?                              | Proton pump inhibitor, PPI(s), acid suppression, acid suppression therapy, omeprazole, esomeprazole, rabeprazole, pantoprazole, lansoprazole, ilaprazole, dexlansoprazole, standard dose, high dose, double dose                                                                                                                                                                                                                                                                                |
| Has on-demand PPI therapy more effective than continuous daily PPI therapy for the long-term management of patients with NERD or mild ERD?                                                             | Gastroesophageal reflux, esophagitis, heartburn, gastric acid reflux, esophageal reflux, GERD, GER, proton pump inhibitor, maintenance, recurrence, omeprazole, esomeprazole, rabeprazole, pantoprazole, lansoprazole, ilaprazole, dexlansoprazole, on-demand, on-demand, continuous, intermittent                                                                                                                                                                                              |
| Are proton pump inhibitors recommended to treat non-cardiac chest pain in patients with typical GERD symptoms?                                                                                         | Noncardiac chest pain, non-cardiac chest pain, atypical chest pain, functional chest pain, NCCP, proton pump inhibitor, proton pump inhibitors, omeprazole, lansoprazole, pantoprazole, rabeprazole, esomeprazole, dexlansoprazole, ilaprazole, randomized controlled trial, controlled clinical trial, randomized, placebo, drug therapy, randomly, trial, groups                                                                                                                              |
| Are PPIs recommended for patients with Barrett's esophagus to reduce the risk of progression to high-grade dysplasia or adenocarcinoma?                                                                | Barrett, PPI, proton-pump inhibitor(s), proton pump inhibitor(s), omeprazole, lansoprazole, pantoprazole, rabeprazole, esomeprazole, dexlansoprazole, ilaprazole, acid suppression, acid-suppressive, cancer(s), carcinoma(s), adenocarcinoma(s), dysplasia(s)                                                                                                                                                                                                                                  |
| Are there potential risks associated with long-term proton pump inhibitor treatment?                                                                                                                   | Proton pump inhibitor, PPI(s), acid suppression, acid suppression therapy, omeprazole, esomeprazole, rabeprazole, pantoprazole, lansoprazole, ilaprazole, dexlansoprazole, clostridium difficile, clostridium infection, CDI, pseudomembranous colitis, <i>Clostridium difficile</i> ( <i>C. difficile</i> ) infection, <i>Clostridium difficile</i> ( <i>C. difficile</i> )-associated diarrhea (CDAD), infection, diarrhea, colitis                                                           |
| Is the effect of P-CAB comparable with that of PPIs for the initial treatment of patients with GERD?                                                                                                   | Potassium-competitive, P-CAB, vonoprazan, TAK-438, Takecab, tegoprazan, CJ12420, gastroesophageal reflux disease, GERD, nonerosive reflux disease, NERD, erosive re esophagitis, reflux                                                                                                                                                                                                                                                                                                         |
| Does the combination of dose prokinetics with PPI improve GERD symptoms more than PPI monotherapy?                                                                                                     | Gastroesophageal reflux disease, gastroesophageal reflux disease, gastroesophageal reflux, non-erosive reflux disease, reflux esophagitis, erosive reflux disease, endoscopy-negative reflux disease, proton pump inhibitor, prokinetic, prokinetics, erythromycin, metoclopramide, domperidone, cisapride, mosapride, itopride, ABT-229, alosetron, tegaserod, acotiamide, prucalopride, DA-9701, rikkunshito, promotility, relamorelin, cinitapride, ghrelin, revexepride, TZIP-101, TZIP-102 |

GERD, gastroesophageal reflux disease; GER, gastroesophageal reflux; ERD, erosive reflux disease; PPI, proton pump inhibitor; NERD, non-erosive reflux disease; NCCP, non-cardiac chest pain; CDI, *Clostridium difficile* infection; CDAD, *Clostridium difficile*-associated diarrhea; P-CAB, potassium competitive acid blocker.

**Supplementary Table 3.** Asian Studies Included on the Meta-analyses of Acid Exposure Time in 24-Hour Ambulatory pH Monitoring

| First author                      | Year | Country   | n  | Mean AET (%)     | ULN of AET (%) | Estimation method <sup>a</sup> |
|-----------------------------------|------|-----------|----|------------------|----------------|--------------------------------|
| Yano et al <sup>89</sup>          | 2017 | Japan     | 20 | 0.9              | 2.7            | A                              |
| Netinatsunton et al <sup>90</sup> | 2016 | Thailand  | 34 | 0.5              | 1.9            | A                              |
| Wu et al <sup>91</sup>            | 2007 | Hong Kong | 28 | 0.2              | 0.6            | A                              |
| Wu et al <sup>92</sup>            | 1999 | China     | 20 | 1.3              | 3.5            | A                              |
| Moon et al <sup>93</sup>          | 2008 | Korea     | 30 | 1.6 <sup>b</sup> | 5.1            | Bc                             |
| Ferdinandis et al <sup>94</sup>   | 2006 | Sri Lanka | 12 | 1.5 <sup>b</sup> | 3.5            | Bd                             |
| Ho and Kang <sup>95</sup>         | 2000 | Singapore | 15 | 1.9 <sup>b</sup> | 4.0            | Bd                             |
| Saraswat et al <sup>96</sup>      | 1994 | India     | 16 | 1.7 <sup>b</sup> | 3.0            | Bd                             |
| Kim et al <sup>97</sup>           | 2008 | Korea     | 50 | 1.3              | 4.0            | C                              |
| Chun et al <sup>98</sup>          | 2000 | Korea     | 25 | 1.4              | 3.6            | Cc                             |
| Xiao et al <sup>99</sup>          | 2012 | China     | 20 | 0.6 <sup>b</sup> | 2.4            | D                              |
| Ishimura et al <sup>100</sup>     | 2015 | Japan     | 10 | 1.1              | 4.2            | D                              |
| Kawamura et al <sup>101</sup>     | 2016 | Japan     | 42 | NA               | 3.3            | E                              |
| Wang et al <sup>102</sup>         | 2011 | China     | 37 | NA               | 3.1            | E                              |
| Xiao et al <sup>103</sup>         | 2009 | China     | 70 | NA               | 2.7            | E                              |
| Hu et al <sup>104</sup>           | 2002 | Hong Kong | 20 | NA               | 4.6            | E                              |
| Amarasiri et al <sup>105</sup>    | 2012 | Sri Lanka | 30 | NA               | 1.5            | E                              |
| Yi et al <sup>106</sup>           | 2005 | Taiwan    | 21 | NA               | 7.0            | E                              |
| Kawamura et al <sup>107</sup>     | 2011 | Japan     | 10 | 0.3              | 1.2            | Fd                             |

<sup>a</sup>Estimation method: (A) if mean with standard deviation (SD) is present, upper limit of normal (ULN) is estimated by mean + 2SD, (B) if median (range) is present, mean and SD is calculated, and ULN is estimated with mean + 2SD, (C) if both mean with SD and median (range) are present, mean and SD is estimated by median (range) value, and ULN is estimated by mean + 2SD, (D) if median with interquartile range (IQR) is present, mean and SD is calculated, and ULN is estimated with mean + 2SD, (E) 95th percentile is present despite insufficiency of other data, ULN is determined as the presented 95th percentile, (F) if mean (range) is present, mean is used to calculate ULN, if 95th percentile is present and is greater than estimated ULN using mean + 2SD, 95th percentile is used, and if the maximum is present and is lower than estimated ULN using mean  $\pm$  2SD, maximum is used.

<sup>b</sup>Calculated value.

AET, acid exposure time; ULN, upper limit of normal; NA, not applicable.

**Supplementary Table 4.** Summary of the Evidence Supporting Weight Reduction in Patients With Gastroesophageal Reflux Disease

| Reference                                        | Study design                              | Number of patients | Mean BMI at baseline (kg/m <sup>2</sup> ) | Intervention                                                                                                               | Follow-up duration | Outcome                                                                          |
|--------------------------------------------------|-------------------------------------------|--------------------|-------------------------------------------|----------------------------------------------------------------------------------------------------------------------------|--------------------|----------------------------------------------------------------------------------|
| De Bortoli et al, <sup>141</sup><br>2016         | Prospective open-label study              | 217                | 30.5 ± 4.0                                | Calorie-restricted diet (60% carbohydrate, 25% fat, and 15% protein) with aerobic exercise (weight loss of 10%) vs control | 6 mo               | Decreased symptom score<br>Reduction or discontinuation of proton pump inhibitor |
| Singh et al, <sup>134</sup><br>2013              | Prospective cohort study, single-arm      | 332                | 34.7 ± 4.6                                | Face-to-face or phone-based weight management program                                                                      | 6 mo               | Improvement in reflux symptoms                                                   |
| Ness-Jensen et al, <sup>142</sup><br>2013        | Prospective population-based cohort study | 29 610             | 26                                        | No intervention                                                                                                            |                    | Dose-dependent symptom reduction and treatment success                           |
| Mathus-Vliegen and Tygat, <sup>143</sup><br>2002 | Randomized controlled trials              | 34                 | 43.4 ± 6.6                                | Intragastric balloon vs sham                                                                                               | 65 wk              | Improved reflux parameters                                                       |
| Fraser-Moodie, <sup>144</sup><br>1999            | Prospective study, single-arm             | 34                 | 23.5 ± 2.3                                | Dietary advice                                                                                                             | 26 wk              | Decreased symptom score                                                          |
| Kjellin et al, <sup>145</sup><br>1996            | Randomized controlled trials              | 20                 | 31.4 (range 28-42)                        | Very low caloric diet for 6 weeks vs. control                                                                              | 6 mo               | No improvement in reflux symptoms or objective measurements                      |

Data are presented as mean ± SD.

**Supplementary Table 5.** Summary of Direct Comparison Trials Between the Efficacy of On-demand Proton Pump Inhibitor and Continuous Daily Proton Pump Inhibitor in the Long-term Management of Patients With Gastroesophageal Reflux Disease

| Reference                                 | Study design | Population                                                                                                                     | On-demand vs Continuous | Follow-up duration | Outcomes of the failure of PPI treatment                                                        |
|-------------------------------------------|--------------|--------------------------------------------------------------------------------------------------------------------------------|-------------------------|--------------------|-------------------------------------------------------------------------------------------------|
| Jassen et al, <sup>171</sup>              | RCT          | NERD and mild esophagitis treated with P 20 mg QD for 4 wk                                                                     | P 20 mg vs P 20 mg      | 6 mo               | Premature discontinuation due to insufficient symptom control                                   |
| Hansen et al, <sup>170</sup> 2005         | RCT          | Uninvestigated GERD received E 40 mg QD for 4 wk                                                                               | E 20 mg vs E 20 mg      | 6 mo               | Relapse is defined if they need a change in therapy, such as experiencing a relapse in symptoms |
| Sjöstedt et al, <sup>169</sup> 2005       | RCT          | Investigated GERD (LA grades A-D), with endoscopically healed after E 40 mg QD for 4-8 wk                                      | E 20 mg vs E 20 mg      | 6 mo               | Relapse defined as if moderate or severe heartburn persisted for 3 consecutive days             |
| Morgan et al, <sup>168</sup> 2007         | RCT          | Minimum 3-month history of GERD who did on continuous daily PPI therapy for at least one month                                 | R 20 mg vs R 20 mg      | 6 mo               | Discontinuing for inadequate heartburn control                                                  |
| Szucs et al, <sup>167</sup> 2009          | RCT          | Uninvestigated patients with GERD who demonstrated complete relief of symptoms after an initial treatment of 4 wk with E 40 mg | E 20 mg vs E 20 mg      | 26 wk              | Relapse is defined as the “need for a change of therapy.”                                       |
| van der Velden et al, <sup>166</sup> 2010 | RCT          | Continuous proton pump inhibitor or histamine-2-receptor antagonist) for > 6 mo                                                | P 20 mg vs P 20 mg      | 13 wk              | Discontinuing for inadequate relief and usage of rescue medication                              |
| Bayerdörffer et al, <sup>165</sup> 2016   | RCT          | NERD who were heartburn-free after 4 wk’ treatment with E 20 mg daily                                                          | E 20 mg vs E 20 mg      | 6 mo               | Premature discontinuation due to unsatisfactory treatment                                       |

PPI, proton pump inhibitor; RCT, randomized controlled trial; NERD, non-erosive reflux disease; P, pantoprazole; E, esomeprazole; R, rabeprazole; QD, once a day; GERD, gastroesophageal reflux disease; LA, Los Angeles classification.

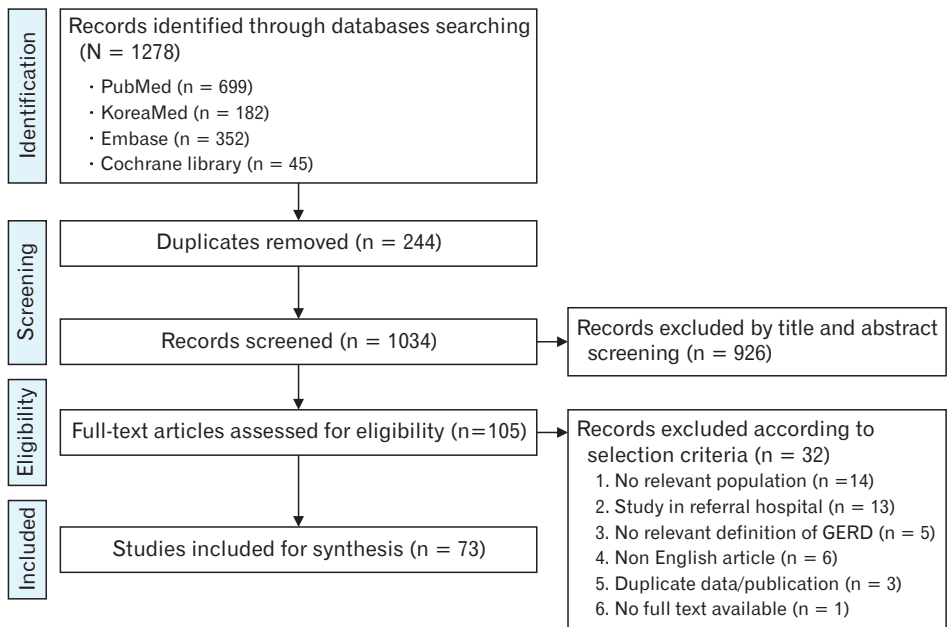

**Supplementary Figure 1.** The Preferred Reporting Items for Systematic Reviews and Meta-analyses (PRISMA) flow diagram of the systematic review process of the epidemiology of gastroesophageal reflux disease in Asia.

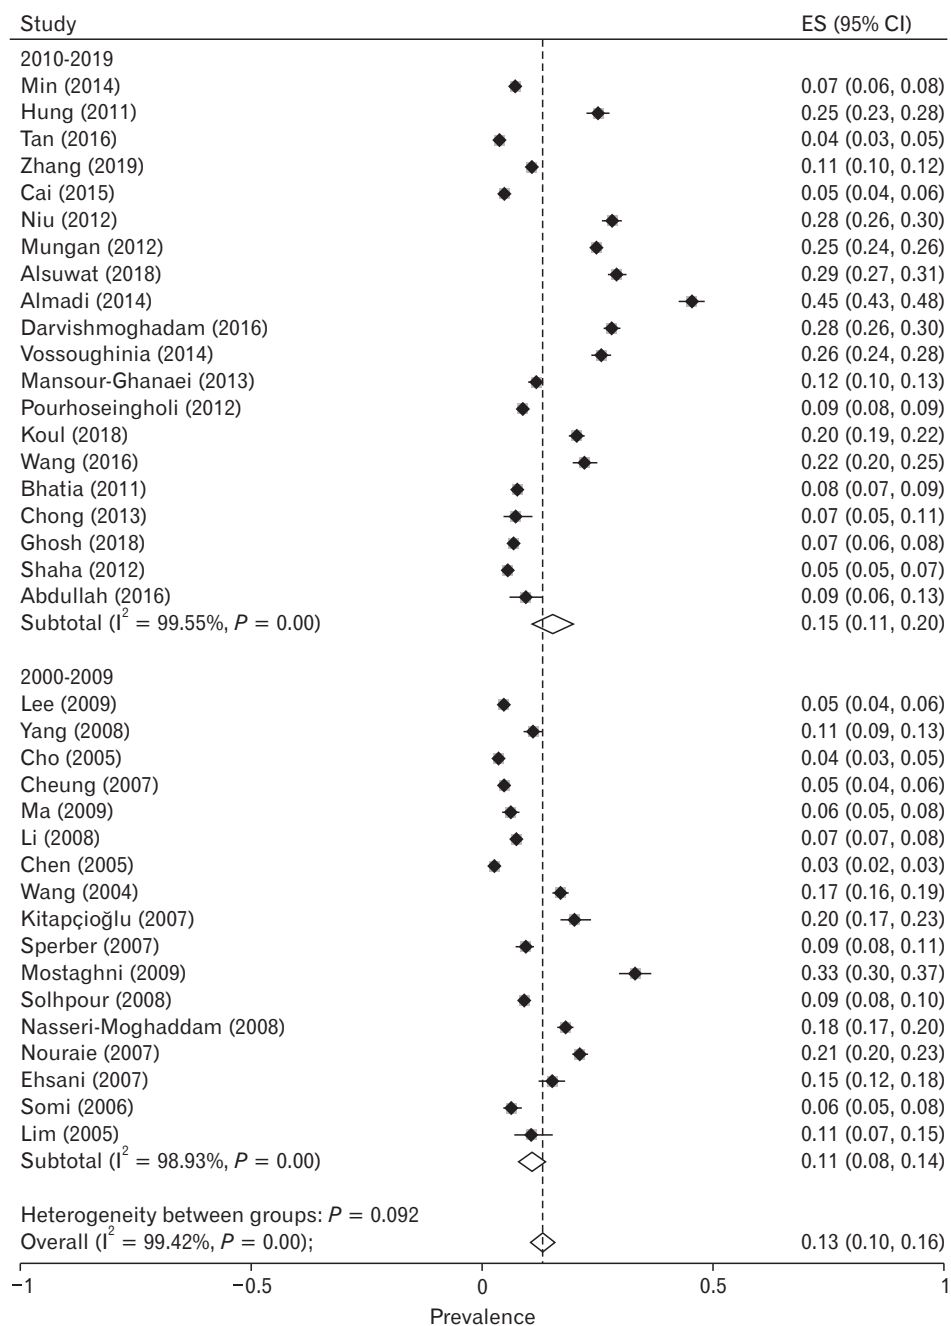

**Supplementary Figure 2.** Forest plot comparison of the prevalence of gastroesophageal reflux disease in population-based studies for 2 periods, 2000-2009 and 2010-2019. ES, effect size.

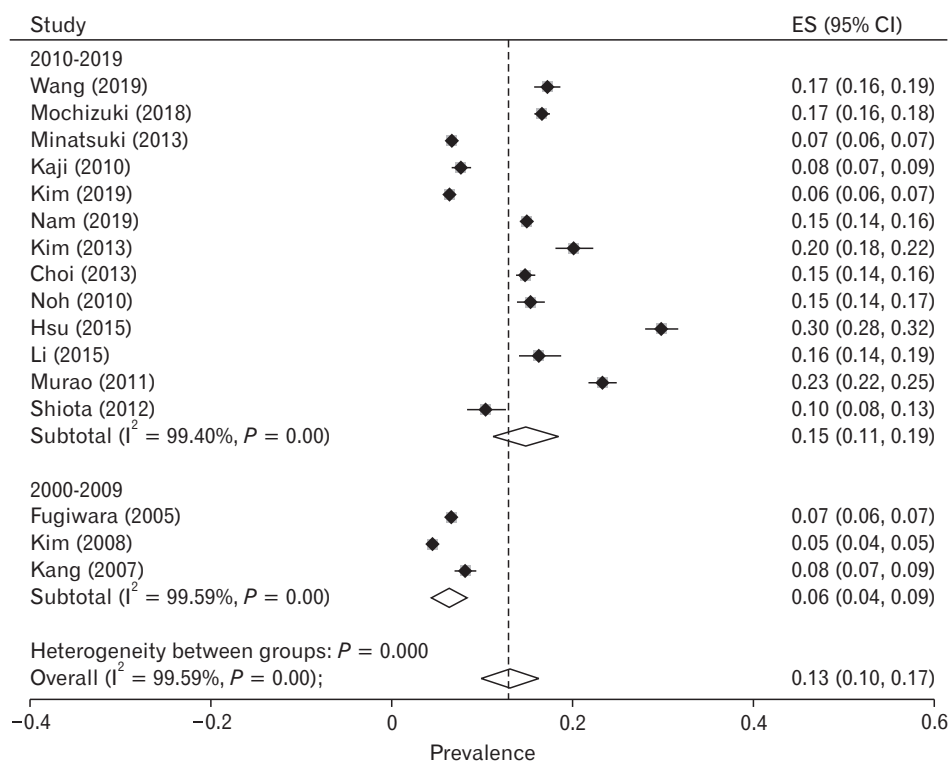

**Supplementary Figure 3.** Forest plot comparison of the prevalence of gastroesophageal reflux disease in observational studies of subjects who underwent medical check-ups in 2000-2009 and 2010-2019. ES, effect size.



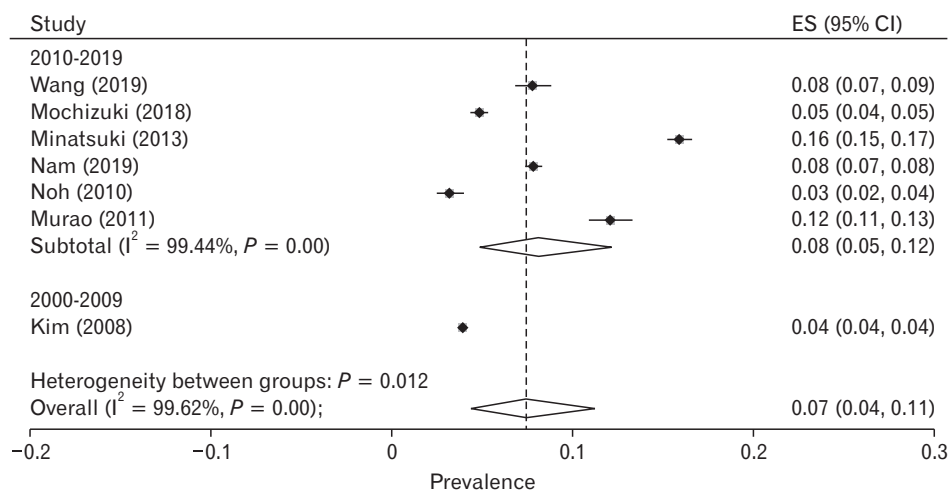

**Supplementary Figure 4.** Forest plot comparison of non-erosive reflux disease prevalence in observational studies of subjects who underwent medical check-ups in 2000-2009 and 2010-2019. ES, effect size.

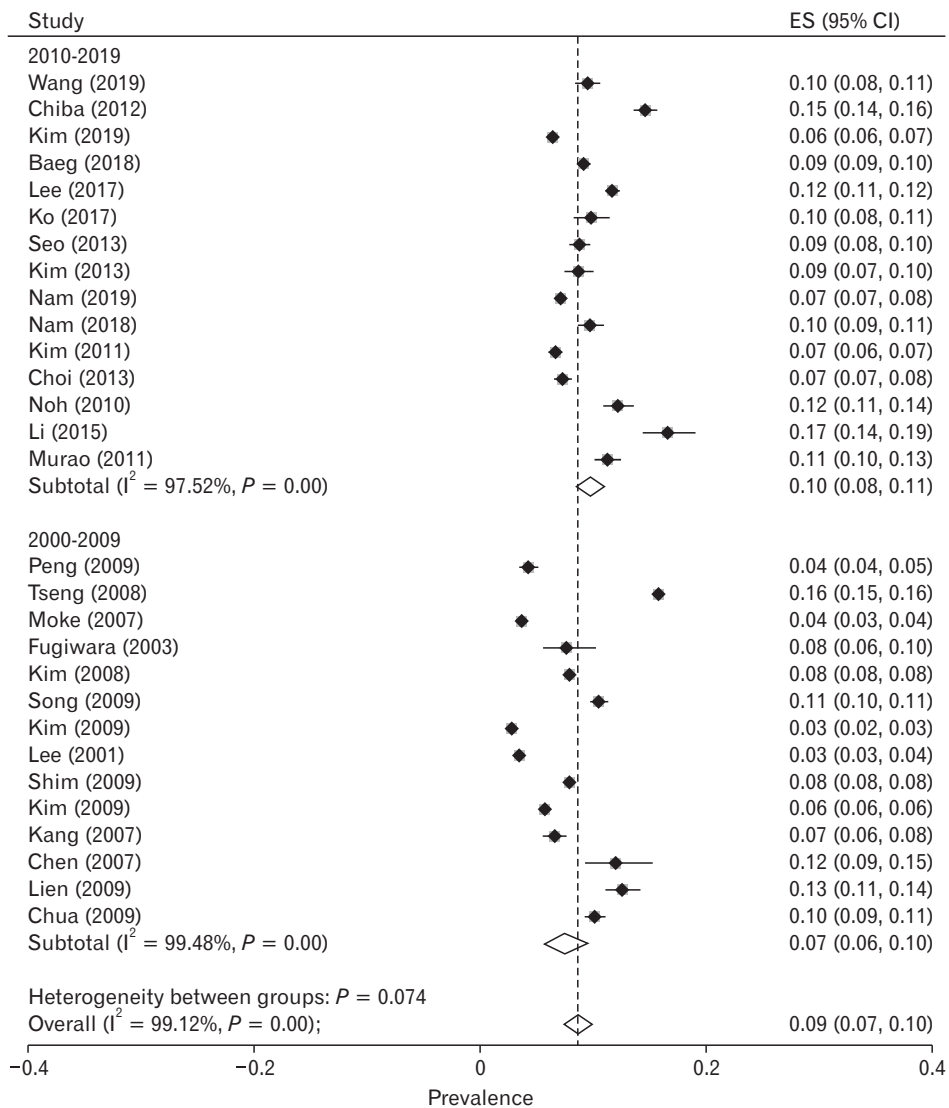

**Supplementary Figure 5.** Forest plot comparison of the prevalence of erosive reflux disease in observational studies of subjects who underwent medical check-ups in 2000-2009 and 2010-2019. ES, effect size.

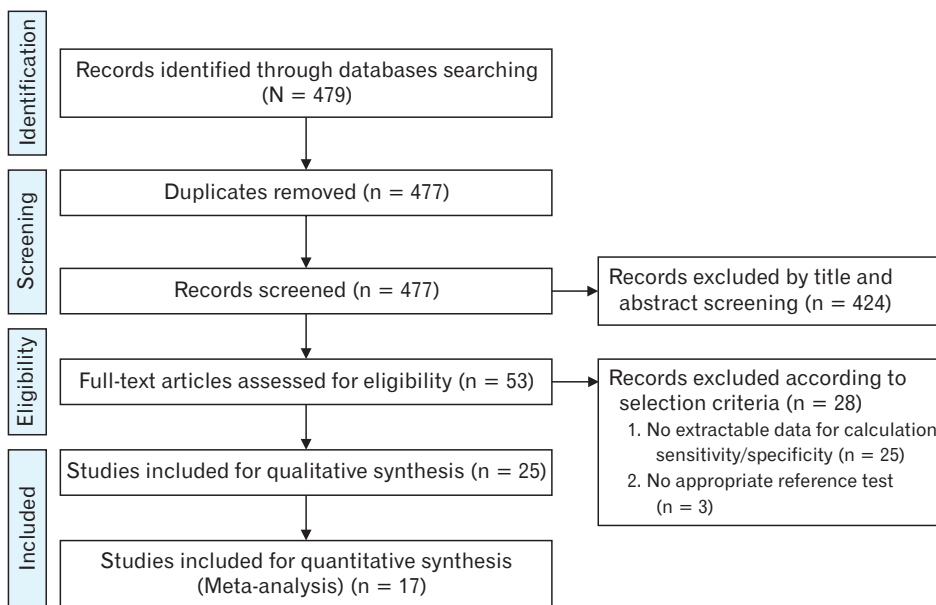

**Supplementary Figure 6.** The Preferred Reporting Items for Systematic Reviews and Meta-analyses (PRISMA) flow diagram of the systematic review process of the diagnostic performance of empirical proton pump inhibitors in gastroesophageal reflux disease.

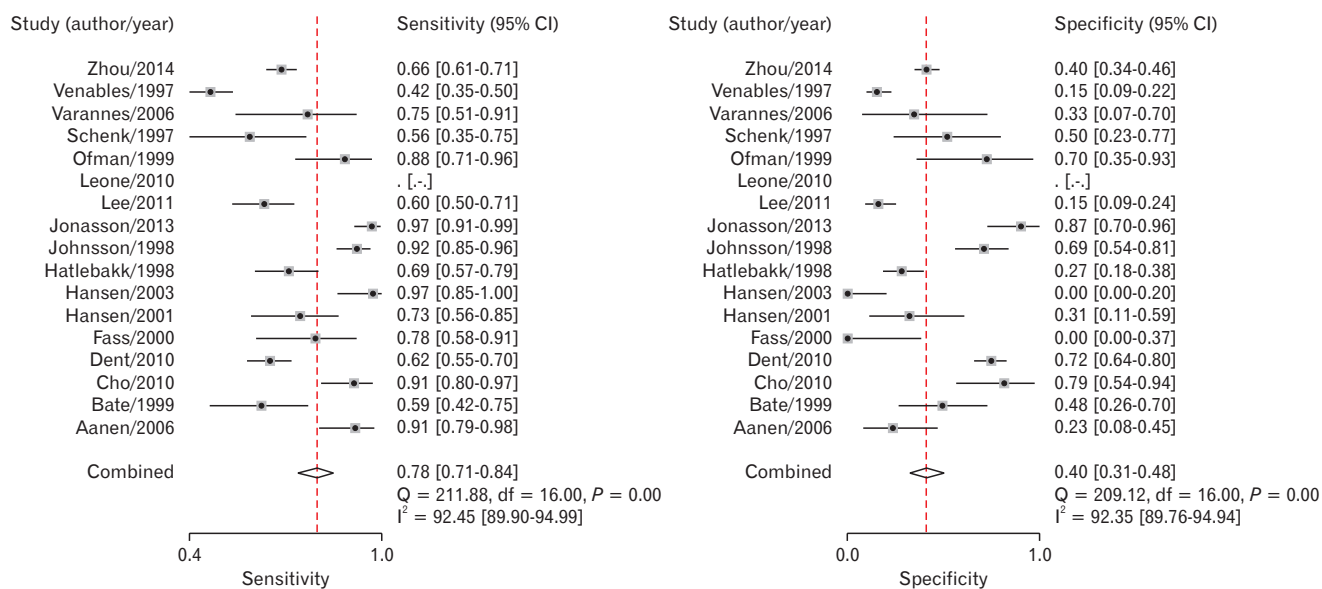

**Supplementary Figure 7.** Forest plot of sensitivity and specificity in a trial of proton pump inhibitors.

**Univariable meta-regression and subgroup analyses**

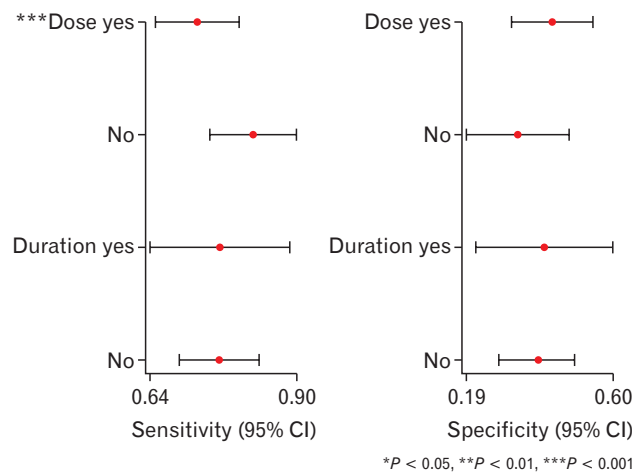

**Supplementary Figure 8.** Forest plot of subgroup analysis of dose (single versus double) and duration (< 2 weeks versus > 2 weeks) of proton pump inhibitors.

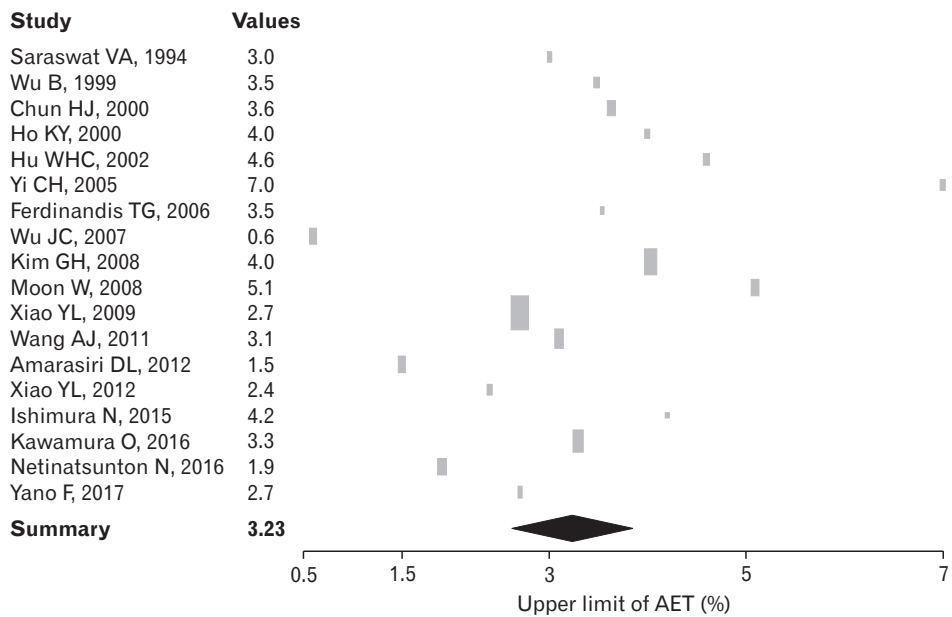

**Supplementary Figure 9.** Forest plot of upper limits of normal for the acid exposure time (AET [%]) in Asian studies.

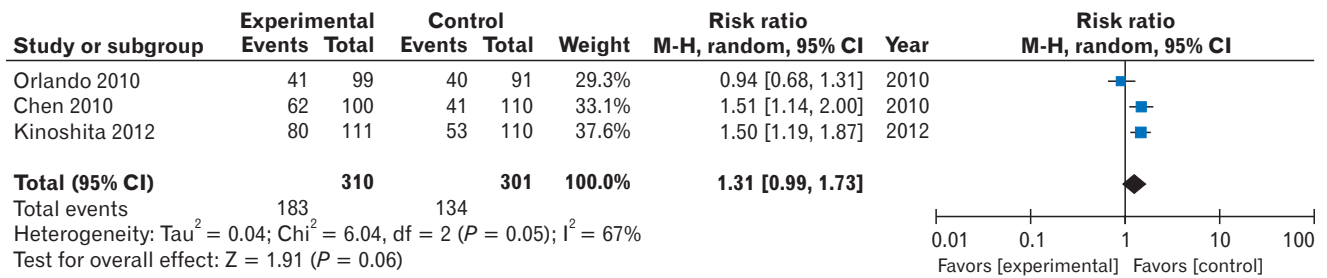

**Supplementary Figure 10.** Forest plot of symptom resolution in the double and standard dose proton pump inhibitor at 4 weeks in patients with gastroesophageal reflux disease. M-H, Mantel-Haenszel.

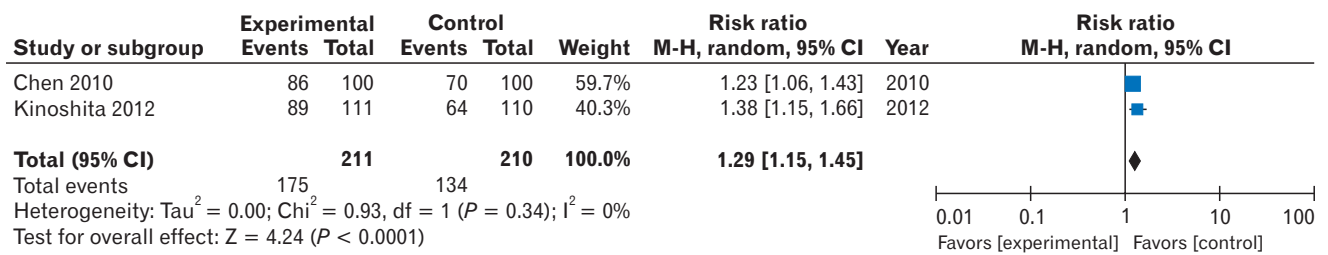

**Supplementary Figure 11.** Forest plot of symptom resolution in the double and standard dose proton pump inhibitor at 8 weeks. M-H, Mantel-Haenszel.



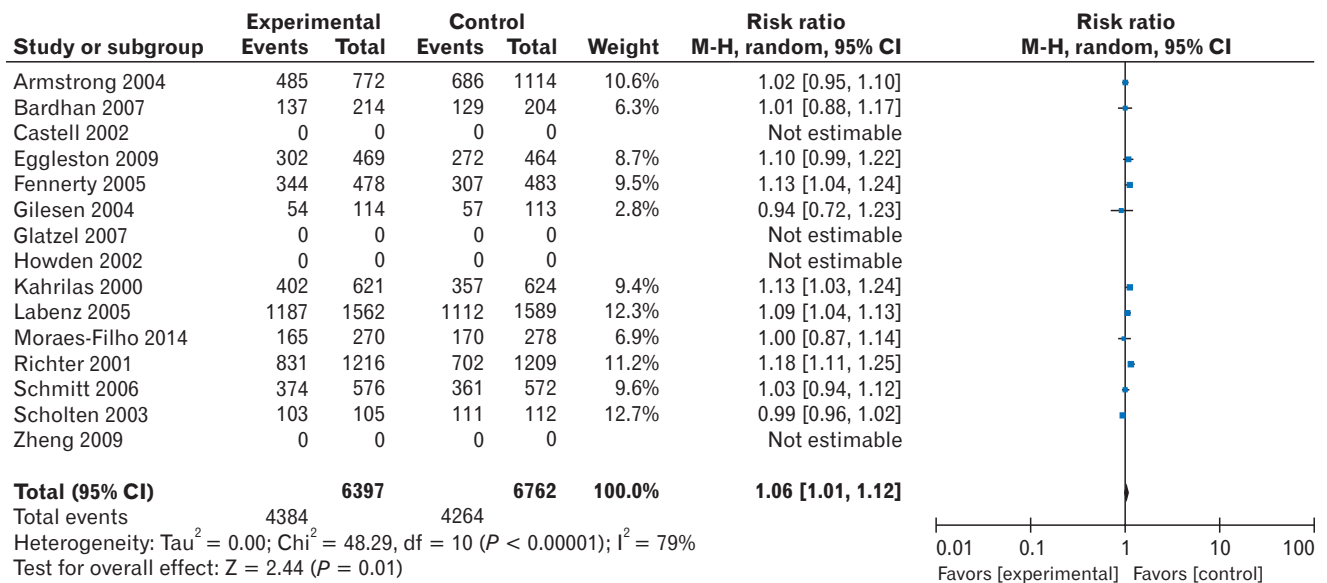

**Supplementary Figure 12.** Forest plot of symptom relief in subjects on esomeprazole 40 mg per day and other standard dose proton pump inhibitors at 4 weeks. M-H, Mantel-Haenszel.

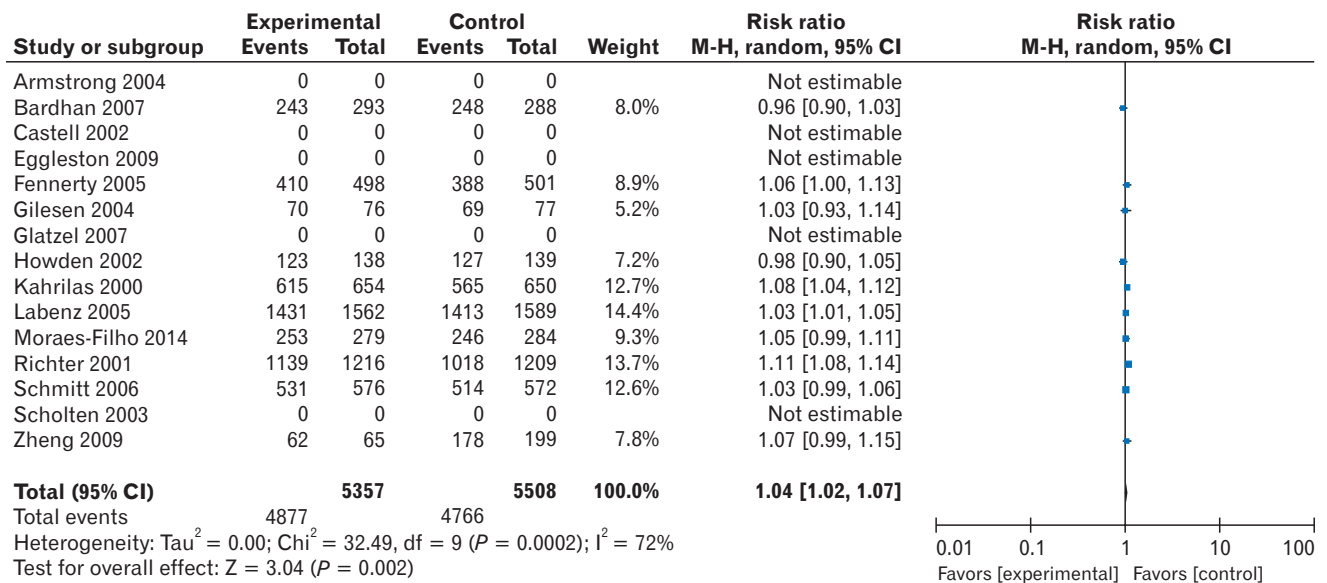

**Supplementary Figure 13.** Forest plot of symptom relief in subjects on esomeprazole 40 mg per day and other standard dose proton pump inhibitors at 8 weeks. M-H, Mantel-Haenszel.

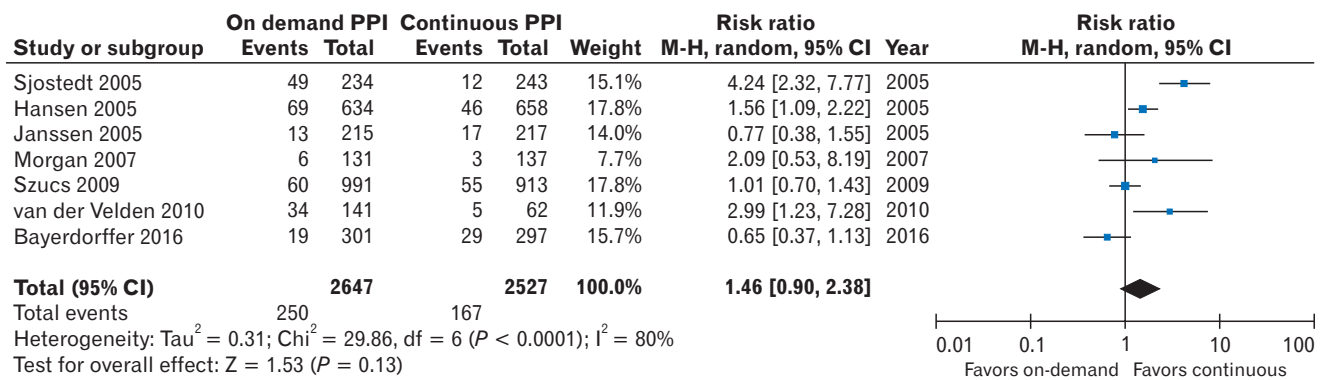

**Supplementary Figure 14.** Forest plot of risk ratios of failure between on-demand proton pump inhibitor (PPI) and continuous PPI groups in long-term management. M-H, Mantel-Haenszel.

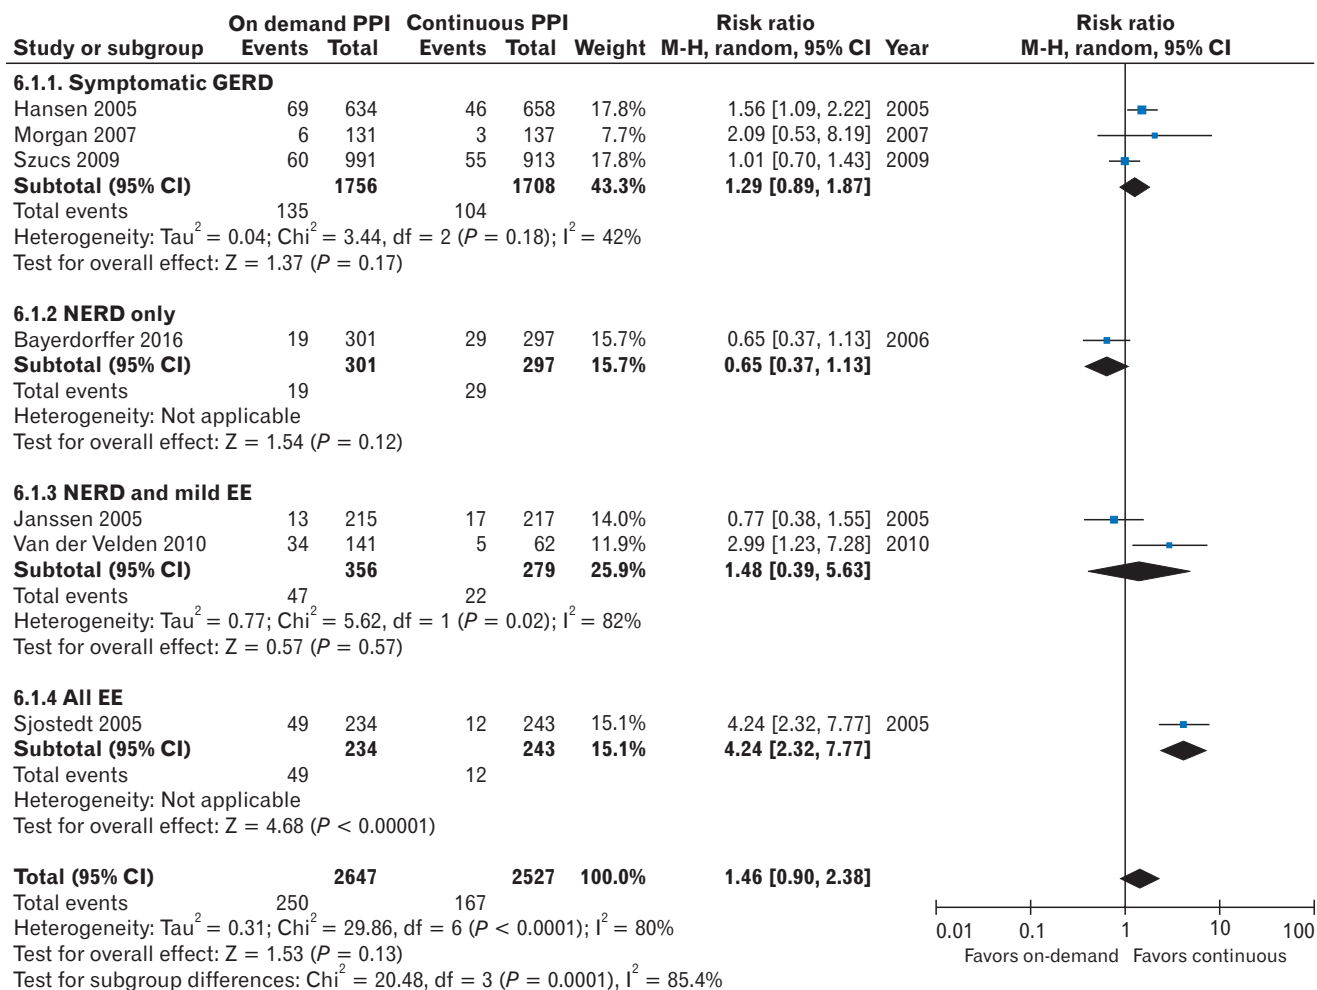

**Supplementary Figure 15.** Forest plot of risk ratios of failure between on-demand proton pump inhibitor (PPI) and continuous PPI groups in long-term management according to each subgroup analysis. GERD, gastroesophageal reflux disease; NERD, non-erosive reflux disease; EE, erosive esophagitis. M-H, Mantel-Haenszel.

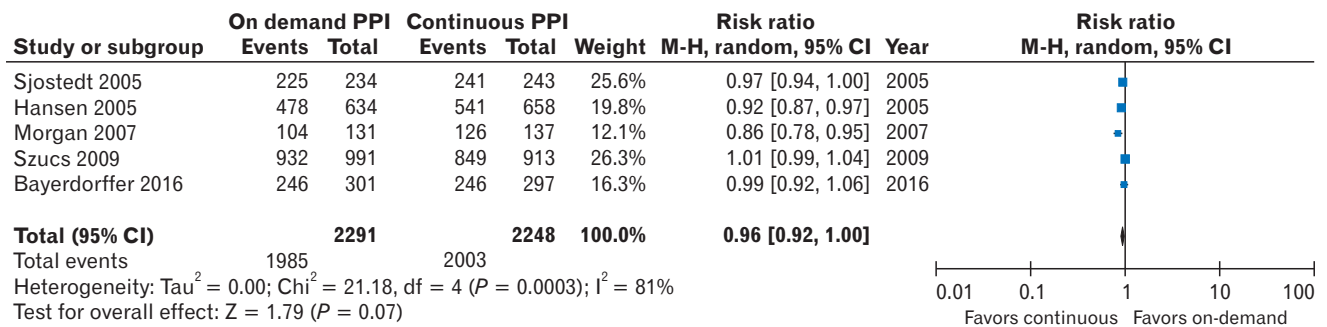

**Supplementary Figure 16.** Forest plot of the satisfaction between the on-demand proton pump inhibitor (PPI) and continuous PPI groups in long-term management. M-H, Mantel-Haenszel.

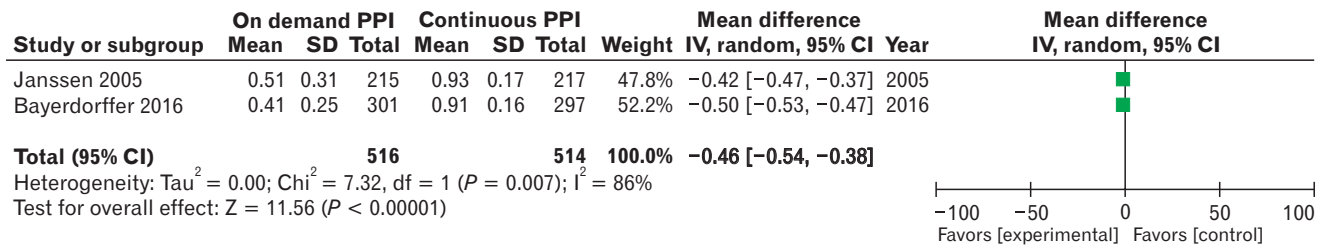

**Supplementary Figure 17.** Forest plot of medication use between on-demand proton pump inhibitor (PPI) and continuous PPI groups in long-term management.

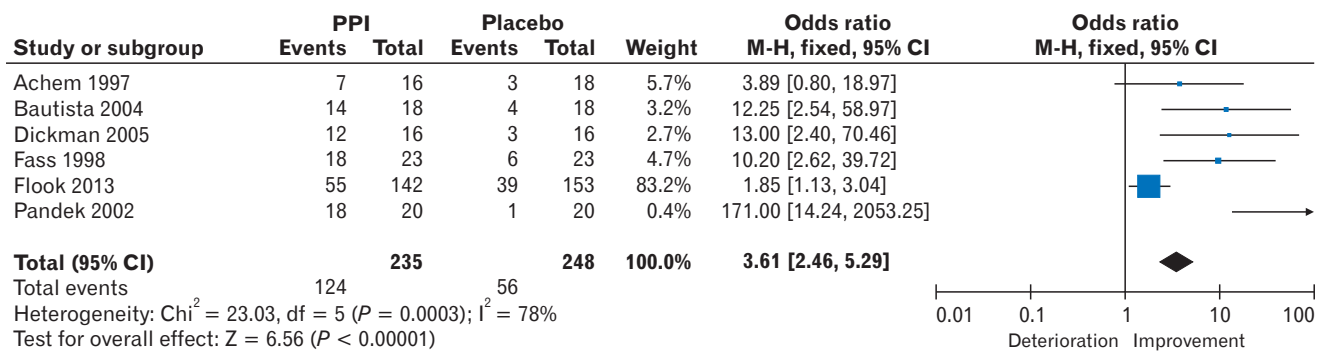

**Supplementary Figure 18.** Forest plot of the benefits from the proton pump inhibitor (PPI) treatment in gastroesophageal reflux disease positive patients with non-cardiac chest pain. M-H, Mantel-Haenszel.

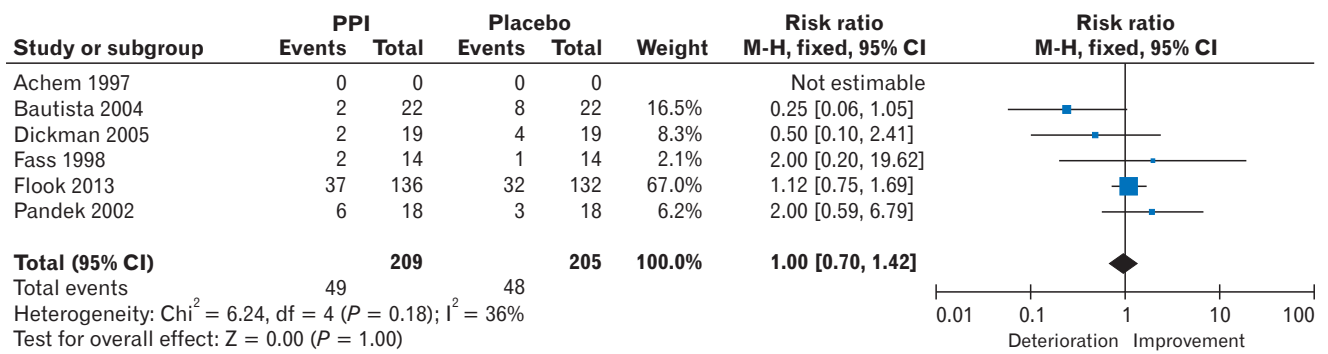

**Supplementary Figure 19.** Forest plot of the benefits from the proton pump inhibitor (PPI) treatment in gastroesophageal reflux disease negative patients with non-cardiac chest pain. M-H, Mantel-Haenszel.



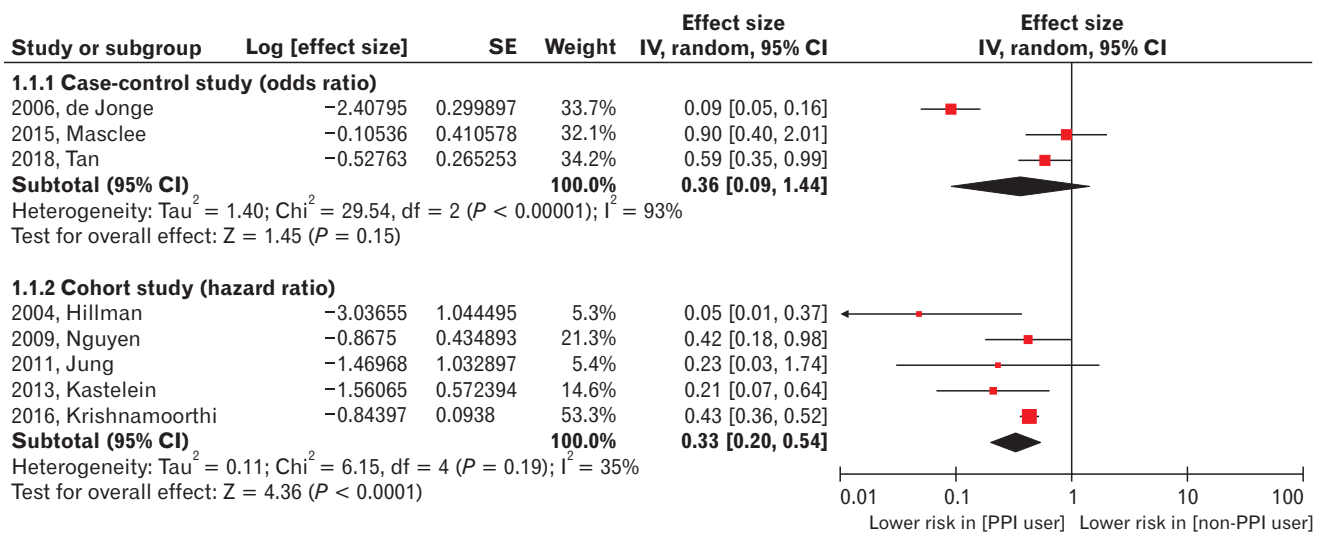

**Supplementary Figure 20.** Forest plot of the odds ratio of proton pump inhibitor (PPI) medication in the risk of progression into high-grade dysplasia or adenocarcinoma.

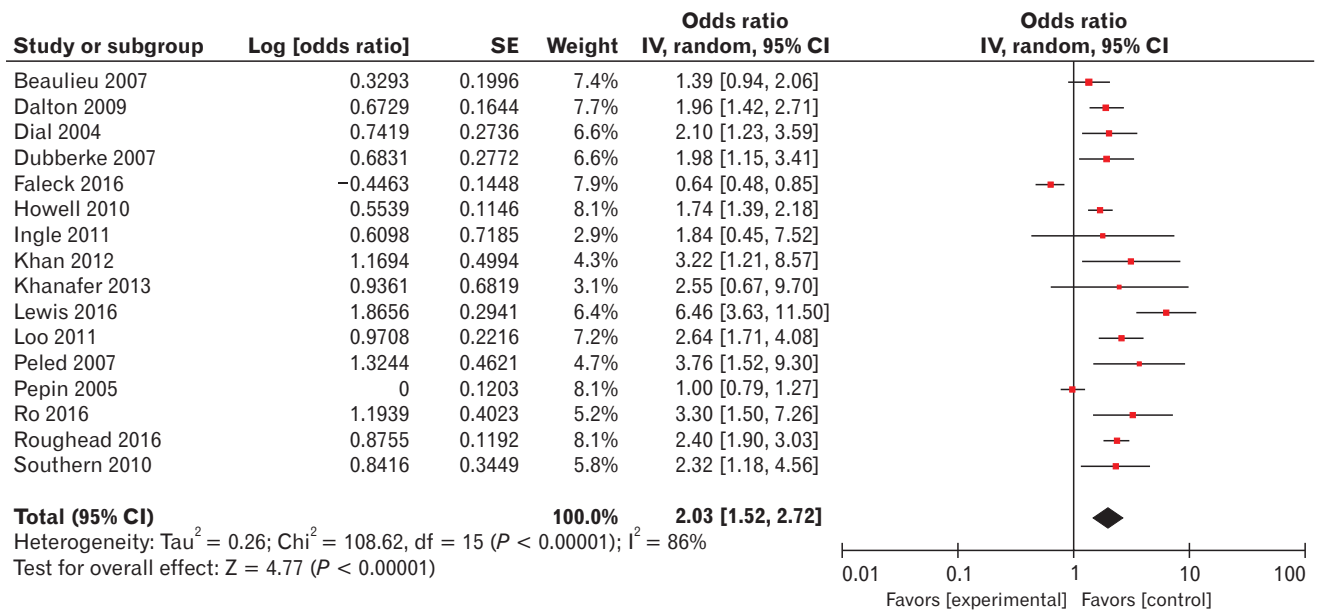

**Supplementary Figure 21.** Forest plot of the odds ratio of proton pump inhibitor medication in the risk of *Clostridium difficile* infection.

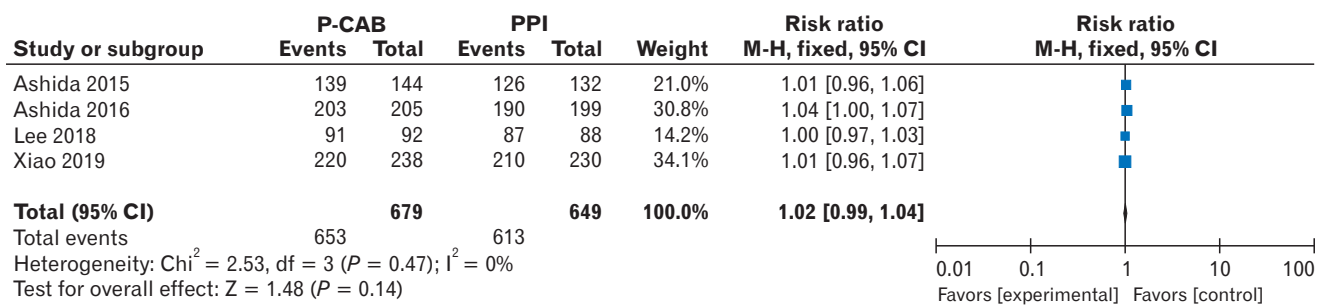

**Supplementary Figure 22.** Forest plot of the risk ratio of potassium-competitive acid blockers (P-CABs) in erosive esophagitis healing rates at 8 weeks. PPI, proton pump inhibitor. M-H, Mantel-Haenszel.

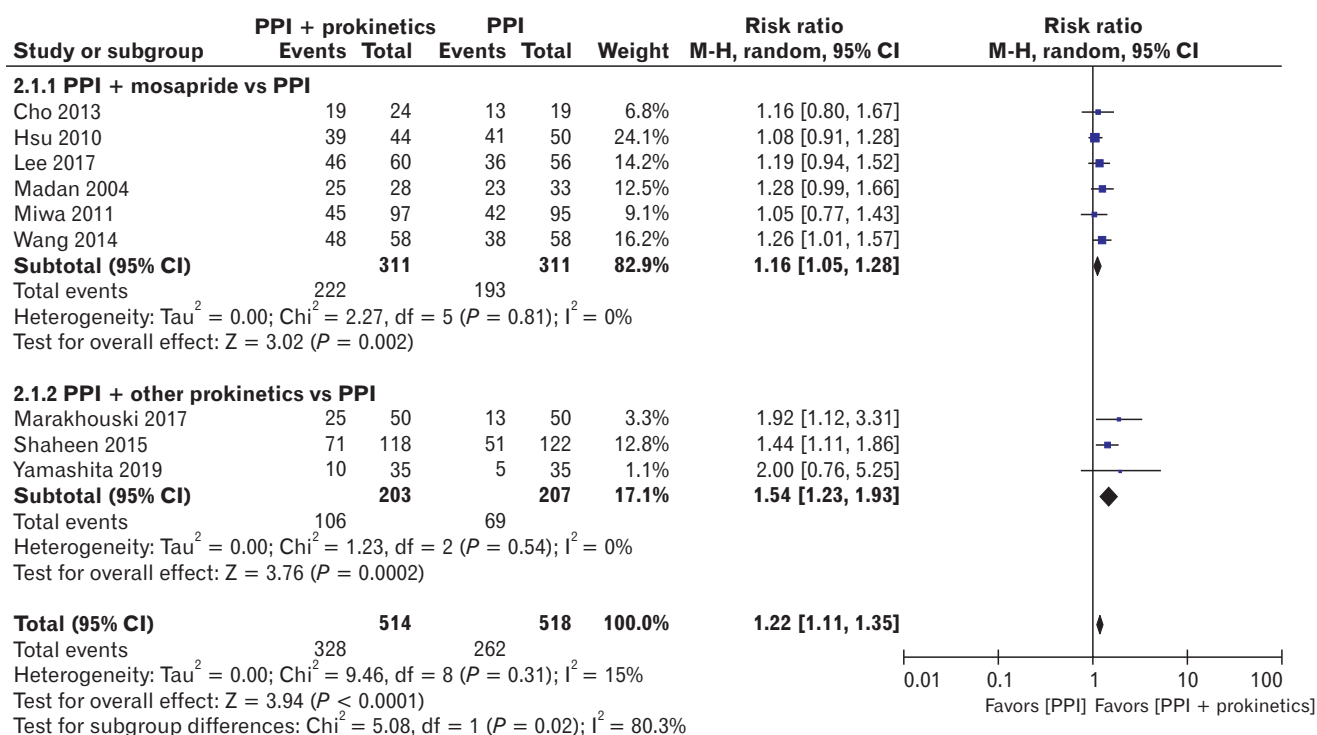

**Supplementary Figure 23.** Forest plot of the risk ratio of proton pump inhibitor (PPI) plus prokinetics treatment in reducing global symptoms of gastroesophageal reflux disease. M-H, Mantel-Haenszel.

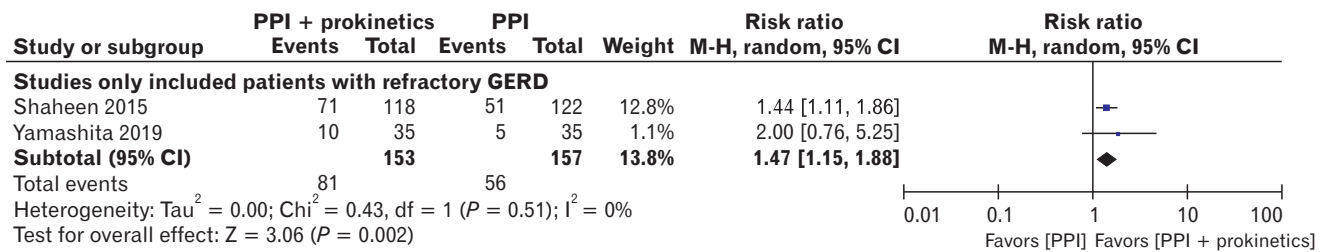

**Supplementary Figure 24.** Forest plot of the risk ratio of proton pump inhibitor (PPI) plus prokinetics treatment in reducing global symptoms of refractory gastroesophageal reflux disease. M-H, Mantel-Haenszel.
